# Supplementary material for: Selective retention of virus-specific tissue-resident T cells in healed skin after recovery from herpes zoster
Source: PubMed Central journal article supplement (PMC9663441; doi:10.1038/s41467-022-34698-4), 2022-11-15
Supplement: 41467_2022_34698_MOESM1_ESM.pdf [file 41467_2022_34698_MOESM1_ESM.pdf]

Supplementary Fig. 1, Laing et al.

A

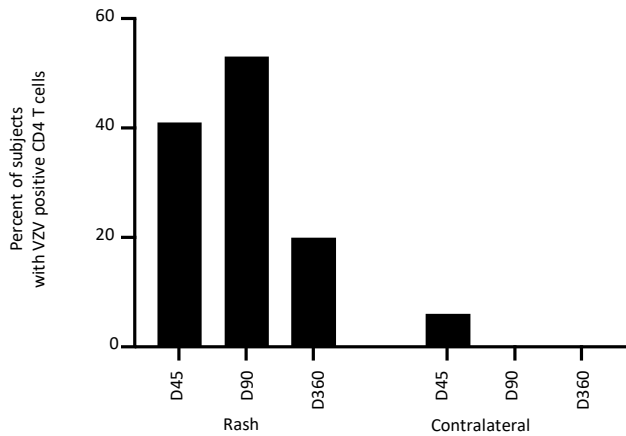

C

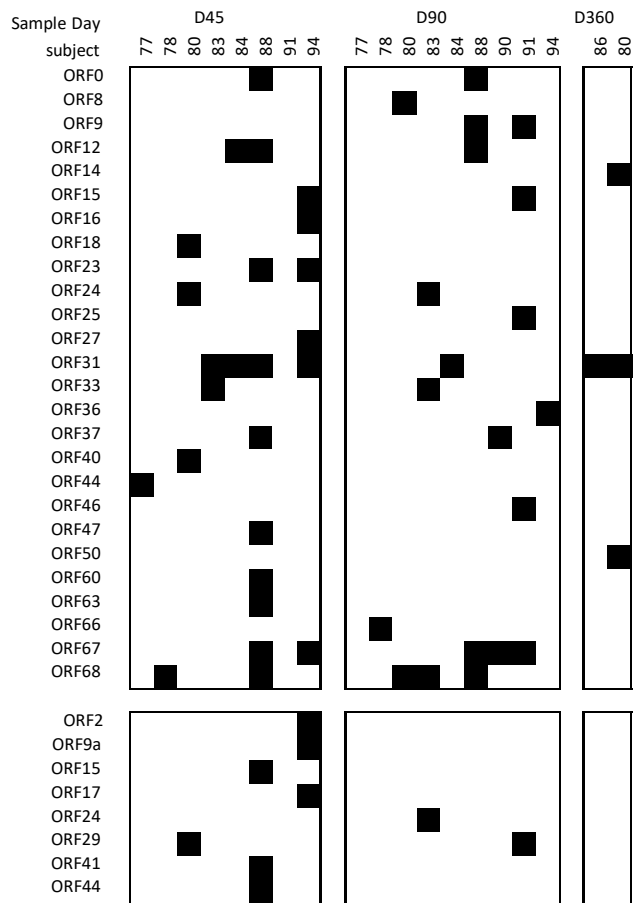

B

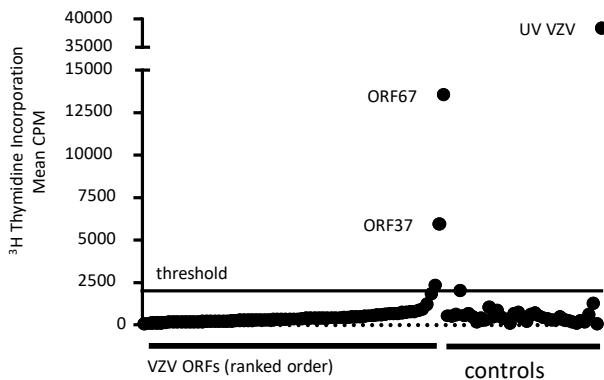

Supplementary Fig. 1 A. Expanded T cell lines from rash and unaffected contralateral skin were scored positive if net CD4 T cell responses to VZV detected by ICS for IFN- $\gamma$  and/or IL-2 exceeded 3% of all CD4 T cells. Bar graphs show the percent of subjects with positive response on an indicated day (day 45 and day 90 n=17; day 360, n=10). B. Representative screen for T cell proliferative responses to all VZV proteins using  $^3\text{H}$ -thymidine incorporation. A cell line-specific threshold for positivity was determined using outlier analyses based on the median + (3.2 x MAD) responses of a series of negative controls as detailed in Methods. C. Heatmap showing positive CD4 T cell responses (black squares) to VZV ORFs for T cell lines from the HZ skin sites (HZ-TCL) or contralateral skin sites (CON-TCL) at the day 45, 90, and 360 time-points. Only ORFs that gave at least one positive response are shown. ICS, intracellular cytokine staining; ORF, open reading frame; D45, day 45; D90, day 90; D360, day 360; CPM, counts per minute; VZV, varicella zoster virus; UV VZV, UV-inactivated VZV. Source data are provided as a Source Data file.

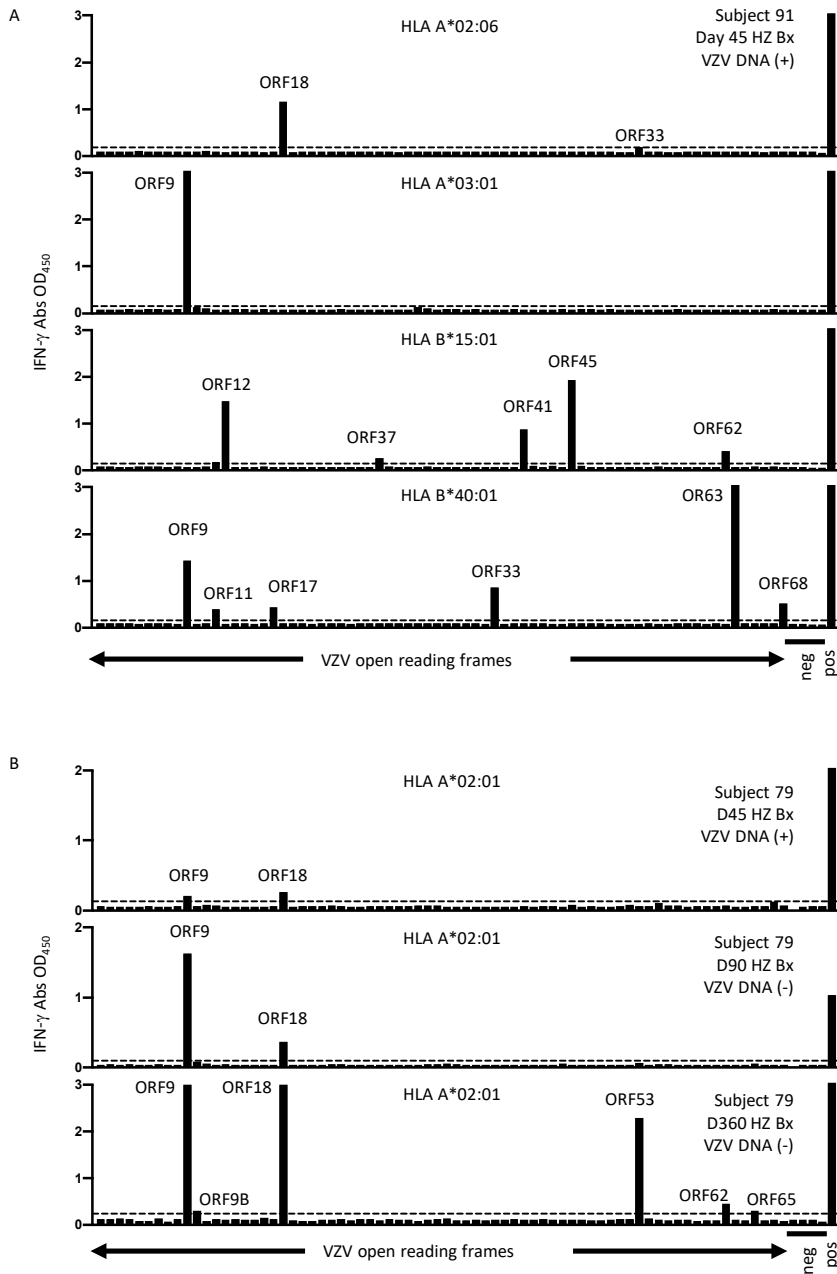

Supplementary Fig. 2. Representative genome-wide screens for CD8 T cell responses to each VZV protein using Cos-7-derived artificial antigen presenting cells (aAPC) co-transfected separately with each subject-specific class I HLA and a single VZV ORF and tested in duplicate with biopsy-derived bulk T cells. Negative controls include Cos-7 transfected with empty vector, the indicated HLA cDNA alone, or no transfection. Positive control is unmanipulated Cos-7 with PHA included in assay wells. CD8 T cell activation was detected by IFN- $\gamma$  ELISA. Bars represent mean of duplicates. Responses were considered positive if they were at least 2X the negative control containing no transfected VZV ORF and had an OD<sub>450</sub> reading at least 0.15 (horizontal line). **A**. Polyclonal T cells expanded from biopsy 45 days after rash onset from subject 91 show broadly HLA class I-restricted recognition of VZV ORFs. Reactive VZV ORFs are labeled. **B**. HLA-A\*02:01 restricted CD8 T cell responses over one year measured in biopsies from subject 79. ORF, open reading frame; D45, day 45; D90, day 90; D360, day 360; HZ Bx, herpes zoster rash site skin biopsy; Abs OD<sub>450</sub>, absorbance optical density at 450 nanometers; VZV, varicella zoster virus; neg, negative control; pos, positive control. Source data are provided as a Source Data file.



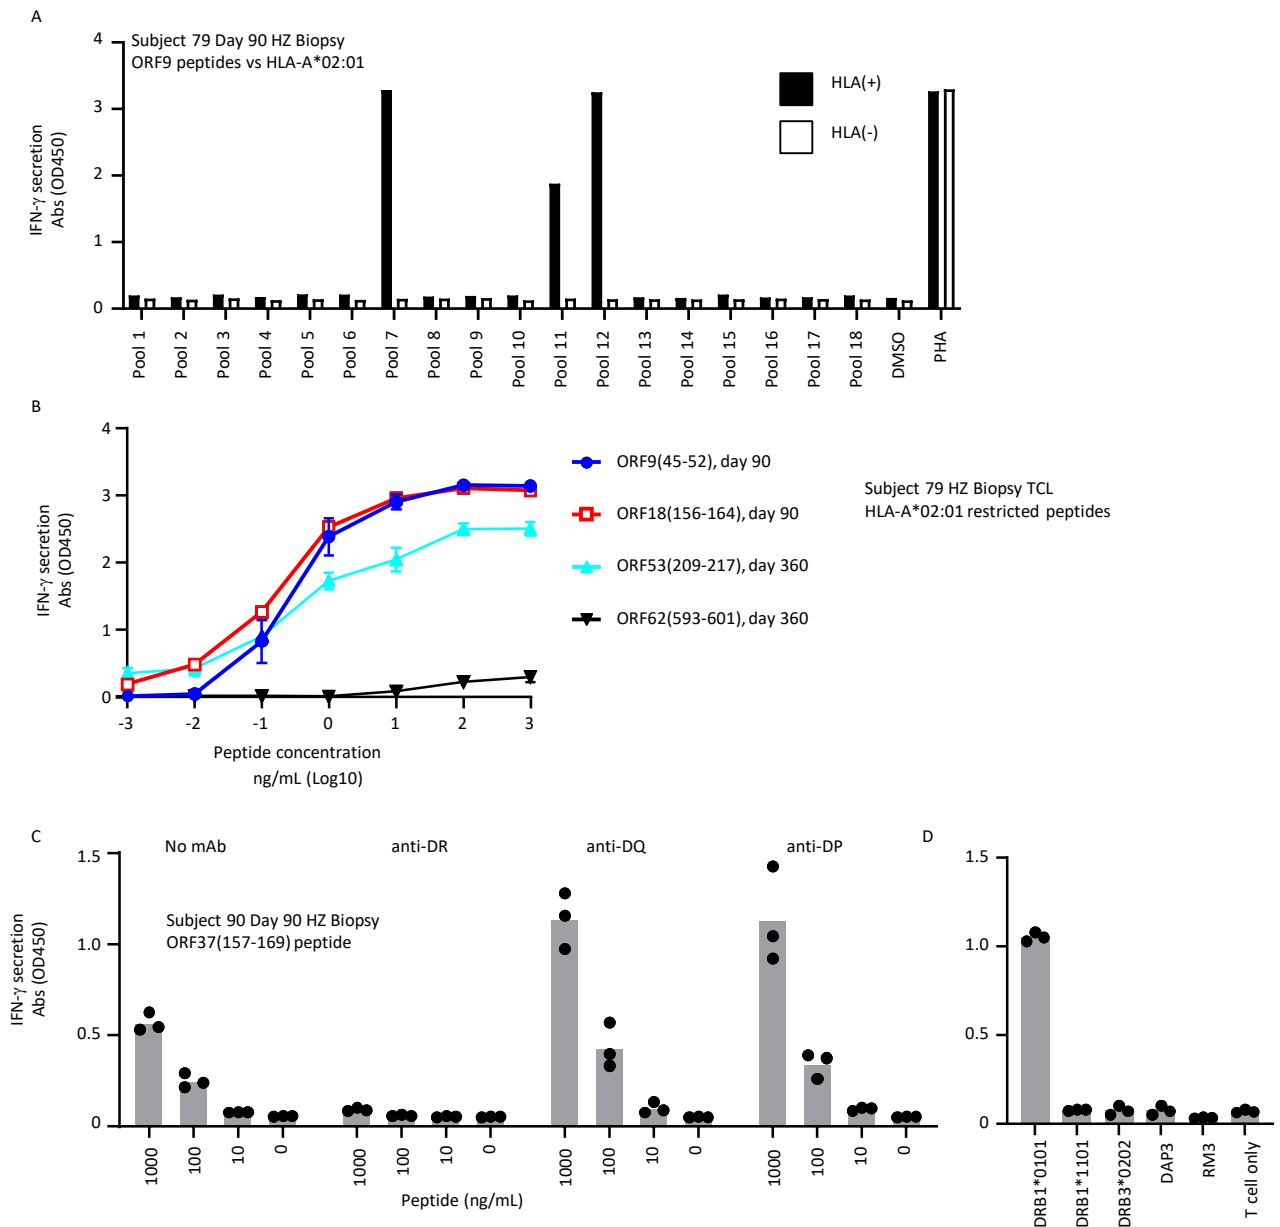

Supplementary Fig. 4: Full-length ORFs that gave positive CD8 or CD4 T cell responses were decoded using peptide pools followed by single peptides. A. The representative example shows VZV ORF9 responses in subject 79 using aAPC expressing (black bars) or lacking (white bars) HLA-A\*02:01 to present peptides to skin-derived T cell lines. T cell activation was detected by IFN- $\gamma$  ELISA. Bars represent mean of duplicate wells. B. Representative dose-response data from subject 79 for four HLA-A\*02:01 restricted epitopes using bulk HZ-site expanded T cells. Data represent mean and SD of triplicate wells. C. Example of HLA restriction locus identification for CD4 T cell epitopes using anti-HLA blocking antibodies during T cell assay exposure to the indicated antigenic peptide. B-LCL were used as APC. Assay readout was IFN- $\gamma$  ELISA. Bars represent mean of triplicate wells. Anti-HLA-DR antibodies are clearly inhibitory for T cell activation by peptide ORF37(157-169) in day 90 HZ biopsy-derived cultures from subject 90. D. Example of HLA allele determination for the using the same cell line/peptide combination described in C. APC express the indicated HLA class II gene or are negative control parental cell lines lacking HLA (DAP.3 and RM3), or T cells alone. Data represent net IFN- $\gamma$  responses to peptide after subtraction of data from wells exposed to DMSO. Bars show mean of triplicate wells. ORF, open reading frame; VZV, varicella zoster virus; UV VZV, UV-inactivated VZV; Abs OD<sub>450</sub>, absorbance optical density at 450 nanometers; B-LCL, B-lymphoblastoid cell line; HZ, herpes zoster rash site skin. Source data are provided as a Source Data file.

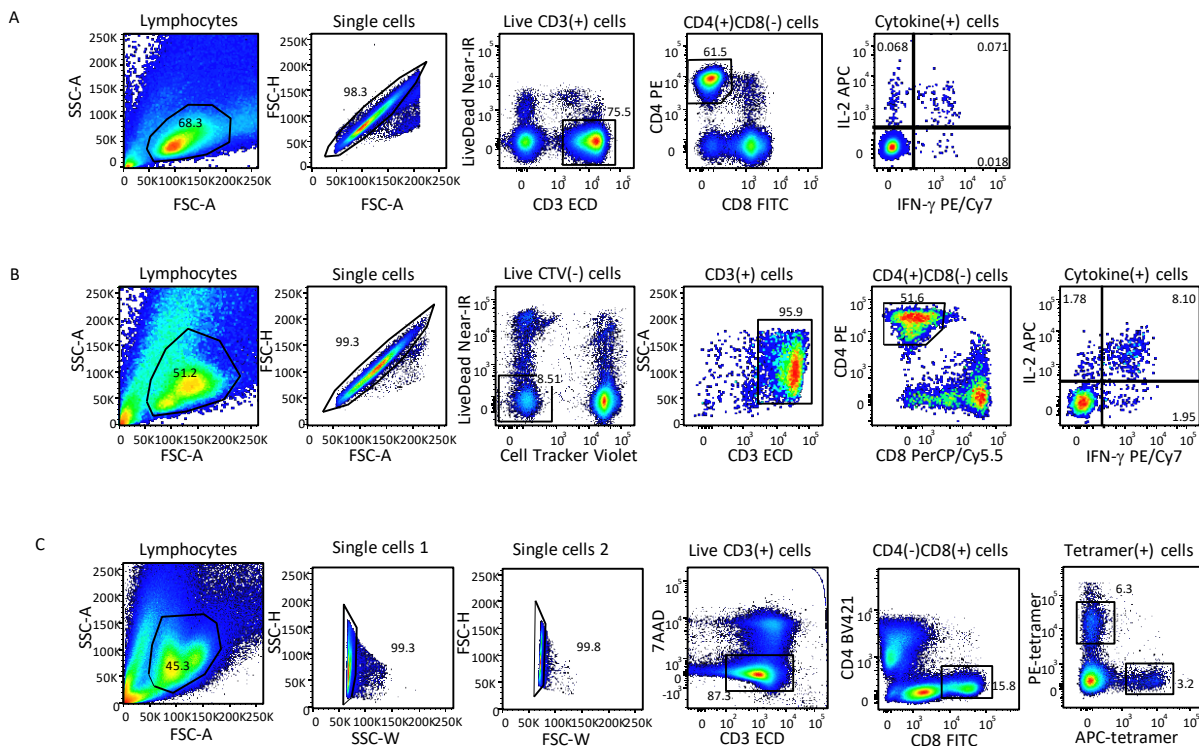

Supplementary Fig 5: Gating strategies for flow cytometric analyses for: A) ex vivo abundance of cytokine (IFN- $\gamma$  and/or IL-2) positive CD4 T cells in PBMC exposed to VZV or control antigens. Example shows subject 80, day 45 PBMC. B) VZV-specific CD4 T cells in skin biopsy-derived T cell lines when CTV-stained PBMC are used as antigen-presenting cells. Example shows subject 94, day 90 rash site T cell line. C) sorting tetramer-specific CD8 T cells from skin biopsy-derived T cell lines. Example shows subject 79, day 360 rash site T cell line.

Supplementary Table 1. Demographic and serologic characteristics and summary of HZ (shingles, zoster) for study subjects.

| Subject | Sex    | Herpesvirus serostatus |          |       |     | Zoster episode            |                   |                        |                        | HLA-A, -B     |               |
|---------|--------|------------------------|----------|-------|-----|---------------------------|-------------------|------------------------|------------------------|---------------|---------------|
|         |        | VZV                    | HSV-1    | HSV-2 | CMV | Rash onset to screen, day | Antiviral therapy | Corticosteroid therapy | Dermatome <sup>1</sup> | A             | B             |
| 77      | Male   | pos                    | neg      | neg   | neg | 33                        | yes               | No                     | L1-L2 (L)              | *24:02 *32:01 | *07:02 *40:01 |
| 78      | Female | pos                    | neg      | neg   | pos | 37                        | yes               | no                     | T7-T8 (R)              | *32:01 *33:03 | *15:01 *51:01 |
| 79      | Female | pos                    | pos      | neg   | neg | 28                        | yes               | no                     | T6-T7 (R)              | *02:01 *32:01 | *15:01        |
| 80      | Female | pos                    | pos      | neg   | neg | 31                        | yes               | no                     | C5-C6 (L)              | *03:01        | *07:02 *51:01 |
| 81      | Male   | pos                    | pos      | neg   | neg | 35                        | yes               | no                     | T4 (R)                 | *01:01 *02:01 | *08:01 *27:05 |
| 82      | Female | pos                    | neg      | neg   | pos | 21                        | yes               | no                     | T6-T7 (L)              | *02:01 *29:02 | *44:03 *51:01 |
| 83      | Male   | pos                    | pos      | neg   | pos | 23                        | yes               | no                     | T8-T9 (R)              | *01:01 *30:01 | *07:02 *13:02 |
| 84      | Male   | pos                    | pos      | neg   | pos | 32                        | yes               | no                     | T7-T8 (R)              | *24:02 *33:03 | *35:01 *44:03 |
| 85      | Female | pos                    | pos      | neg   | neg | 29                        | yes               | no                     | T4 (R)                 | *01:01 *26:01 | *08:01 *14:01 |
| 86      | Male   | pos                    | pos      | neg   | pos | 38                        | yes               | no                     | T6-T7-T8 (L)           | *11:01 *30:02 | *15:01 *18:01 |
| 87      | Male   | pos                    | pos      | neg   | neg | 32                        | yes               | no                     | C7-C8 (L)              | *02:01        | *44:02        |
| 88      | Male   | pos                    | neg      | neg   | neg | 30                        | no                | no                     | T8 (R)                 | *25:01 *30:01 | *13:02 *18:01 |
| 89      | Male   | pos                    | pos      | pos   | pos | 22                        | yes               | no                     | T6 (R)                 | ND            | ND            |
| 90      | Female | pos                    | neg      | neg   | neg | 31                        | yes               | systemic               | T5-T6 (R)              | *03:01 *24:02 | *35:01 *51:07 |
| 91      | Male   | pos                    | pos      | neg   | pos | 26                        | yes               | no                     | T1-T2 (R)              | *02:06 *03:01 | *15:01 *40:01 |
| 92      | Male   | pos                    | atypical | neg   | pos | 31                        | yes               | topical                | C2 (L)                 | *02:01 *02:02 | *45:01 *53:01 |
| 93      | Female | pos                    | pos      | neg   | pos | 38                        | yes               | no                     | C8 (R)                 | *24:02 *29:02 | *41:02 *44:03 |
| 94      | Female | pos                    | pos      | neg   | pos | 33                        | yes               | systemic               | T2 (R)                 | *02:07 *11:02 | *40:01 *46:01 |

<sup>1</sup> L, T, and C refer to lumbar, thoracic, and cervical dermatomes, respectively. L and R refer to left and right.

Supplementary Table 2. Summary of immune responses in study subjects

| Subject | HZ VZV DNA <sup>1</sup><br>(copies/swab) |         |       |                  | CON VZV DNA <sup>2</sup><br>(copies/swab) |     |     |      | Blood ex vivo ICS <sup>3</sup><br>(% of CD4 T cells) |      |      | HZ skin<br>T cell line ICS<br>(% of CD4) |      |      | CON skin<br>T cell line ICS<br>(% of CD4) |      |      | Number of VZV proteins<br>recognized by CD4<br>T cells from HZ-TCL <sup>4</sup> |     |                 | Number of VZV proteins<br>recognized by CD4<br>T cells from CON-TCL |     |      | Number of VZV proteins<br>recognized by CD8<br>T cells from HZ-TCL |     |      | Number of VZV proteins<br>recognized by CD8<br>T cells from CON-TCL |     |      |     |     |
|---------|------------------------------------------|---------|-------|------------------|-------------------------------------------|-----|-----|------|------------------------------------------------------|------|------|------------------------------------------|------|------|-------------------------------------------|------|------|---------------------------------------------------------------------------------|-----|-----------------|---------------------------------------------------------------------|-----|------|--------------------------------------------------------------------|-----|------|---------------------------------------------------------------------|-----|------|-----|-----|
|         | D30                                      | D45     | D90   | D360             | D30                                       | D45 | D90 | D360 | D45                                                  | D90  | D360 | D45                                      | D90  | D360 | D45                                       | D90  | D360 | D45                                                                             | D90 | D360            | D45                                                                 | D90 | D360 | D45                                                                | D90 | D360 | D45                                                                 | D90 | D360 | D45 | D90 |
| 77      | 4500                                     | 0       | 0     | dec <sup>5</sup> | ns <sup>6</sup>                           | 0   | 0   | dec  | 0.05                                                 | 0.05 | dec  | 3.35                                     | 3.62 | dec  | 0.06                                      | 0.06 | dec  | 0                                                                               | 0   | dec             | 1                                                                   | 0   | dec  | 5                                                                  | 3   | dec  | 0                                                                   | 0   | dec  |     |     |
| 78      | 0                                        | 0       | 0     | 0                | ns                                        | 0   | 0   | 257  | 0.07                                                 | 0.04 | 0.06 | 25.7                                     | 14.9 | 0.09 | 2.7                                       | 0    | 0    | 1                                                                               | 1   | nd <sup>7</sup> | 0                                                                   | 0   | nd   | 1                                                                  | 1   | 0    | 0                                                                   | 0   | 0    |     |     |
| 79      | 11250                                    | 1953.5  | 0     | 0                | ns                                        | 0   | 0   | 0    | 0.07                                                 | 0.04 | 0.06 | 0.11                                     | 0    | 0.26 | 0                                         | 0    | 0    | nd                                                                              | nd  | nd              | nd                                                                  | nd  | nd   | 2                                                                  | 2   | 6    | 1                                                                   | 1   | 1    |     |     |
| 80      | 0                                        | 0       | 0     | 0                | ns                                        | 0   | 0   | 0    | 0.13                                                 | 0.13 | 0.03 | 0.36                                     | 26.1 | 13.8 | 0.2                                       | 0.14 | 0    | 3                                                                               | 2   | 3               | 1                                                                   | 0   | 0    | 4                                                                  | 4   | 0    | 0                                                                   | 0   | 0    |     |     |
| 81      | 1850                                     | 0       | 0     | 0                | ns                                        | 0   | 0   | 0    | 0.06                                                 | 0.02 | 0.02 | 0.09                                     | 0.63 | 0.11 | 0                                         | 0    | 0    | nd                                                                              | nd  | nd              | nd                                                                  | nd  | nd   | 0                                                                  | 0   | 0    | 1                                                                   | 1   | 0    |     |     |
| 82      | 900                                      | 389.5   | 0     | dec              | ns                                        | 0   | 0   | dec  | 0.14                                                 | 0.13 | dec  | 0.08                                     | 0    | dec  | 0.93                                      | 1.54 | dec  | nd                                                                              | nd  | dec             | nd                                                                  | nd  | dec  | 1                                                                  | 1   | dec  | 1                                                                   | 1   | dec  |     |     |
| 83      | 24000                                    | 0       | 0     | 0                | ns                                        | 0   | 0   | 0    | 0.20                                                 | 0.18 | 0.03 | 21.5                                     | 5.9  | 0    | 0                                         | 0    | 0    | 2                                                                               | 3   | nd              | 0                                                                   | 1   | nd   | 8                                                                  | 1   | 2    | 1                                                                   | 2   | 0    |     |     |
| 84      | 198.5                                    | 360     | 0     | dec              | ns                                        | 0   | 0   | dec  | 0.29                                                 | 0.05 | dec  | 7.02                                     | 7.33 | dec  | 0.05                                      | 0.37 | dec  | 2                                                                               | 1   | dec             | 0                                                                   | 0   | dec  | 4                                                                  | 2   | dec  | 1                                                                   | 2   | dec  |     |     |
| 85      | 859.5                                    | 22573.5 | 3745  | 0                | ns                                        | 0   | 0   | 0    | 0.07                                                 | 0.02 | 0.02 | 1.2                                      | 0.09 | 0    | 0                                         | 0    | 0    | nd                                                                              | nd  | nd              | nd                                                                  | nd  | nd   | 2                                                                  | 1   | 1    | 3                                                                   | 0   | 0    |     |     |
| 86      | 5490                                     | 1934    | 0     | 0                | ns                                        | 0   | 0   | 0    | 0.07                                                 | 0.02 | 0.04 | 0.73                                     | 0.09 | 4.05 | 1.38                                      | 0    | 0    | nd                                                                              | nd  | nd              | nd                                                                  | nd  | nd   | 4                                                                  | 1   | 0    | 0                                                                   | 0   | 1    |     |     |
| 87      | 1650000                                  | 84547   | 181.5 | dec              | ns                                        | 0   | 0   | dec  | 0.22                                                 | 0.04 | dec  | 0                                        | 0    | dec  | 0.12                                      | 0    | dec  | nd                                                                              | nd  | dec             | nd                                                                  | nd  | dec  | 4                                                                  | 2   | dec  | 0                                                                   | 1   | dec  |     |     |
| 88      | 0                                        | 0       | 0     | dec              | ns                                        | 0   | 0   | dec  | 0.17                                                 | 0.08 | dec  | 43.4                                     | 50.9 | dec  | 4.29                                      | 0    | dec  | 10                                                                              | 5   | dec             | 3                                                                   | 0   | dec  | 4                                                                  | 0   | dec  | 0                                                                   | 0   | dec  |     |     |
| 89      | 7000                                     | dec     | dec   | dec              | ns                                        | dec | dec | dec  | 0.19                                                 | 0.12 | dec  | dec                                      | dec  | dec  | dec                                       | dec  | dec  | dec                                                                             | dec | dec             | dec                                                                 | dec | dec  | dec                                                                | dec | dec  | dec                                                                 | dec | dec  |     |     |
| 90      | 33645.5                                  | 151.5   | 0     | 0                | ns                                        | 0   | 0   | 0    | 0.16                                                 | 0.06 | 0.08 | 0.47                                     | 22.2 | 0    | 0                                         | 2.89 | 0    | nd                                                                              | 0   | nd              | nd                                                                  | 2   | nd   | 4                                                                  | 2   | 0    | 1                                                                   | 1   | 0    |     |     |
| 91      | 157700                                   | 1931.5  | 0     | 0                | ns                                        | 0   | 0   | 0    | 0.45                                                 | 0.15 | 0.12 | 6.11                                     | 28.7 | 0    | 0                                         | 0.32 | 0    | 0                                                                               | 1   | nd              | 0                                                                   | 6   | nd   | 13                                                                 | 0   | 1    | 0                                                                   | 3   | 0    |     |     |
| 92      | 0                                        | 0       | 0     | dec              | ns                                        | 0   | 0   | dec  | 0.03                                                 | 0.15 | dec  | 0                                        | 0.01 | dec  | 0.01                                      | 0    | dec  | nd                                                                              | nd  | dec             | nd                                                                  | nd  | dec  | 0                                                                  | 0   | dec  | 0                                                                   | 0   | dec  |     |     |
| 93      | 1176                                     | 0       | 0     | 0                | ns                                        | 0   | 0   | 0    | 0.40                                                 | 0.09 | 0.12 | 1.09                                     | 2.57 | 0.25 | 0.02                                      | 0    | 0.24 | nd                                                                              | nd  | nd              | nd                                                                  | nd  | nd   | 2                                                                  | 3   | 1    | 0                                                                   | 1   | 0    |     |     |
| 94      | 0                                        | 0       | 0     | 0                | ns                                        | 0   | 0   | 0    | 0.26                                                 | 0.30 | 0.14 | 73.1                                     | 9.54 | 0    | 0                                         | 0    | 0    | 6                                                                               | 1   | nd              | 3                                                                   | 0   | nd   | 4                                                                  | 2   | 3    | 1                                                                   | 0   | 0    |     |     |

<sup>1</sup> HZ VZV DNA, copies of VZV DNA determined by PCR from healed site of herpes zoster eruption

<sup>2</sup> CON VZV DNA, copies of VZV DNA determined by PCR from contralateral, uninvolved skin

<sup>3</sup> ICS values represent net % of cytokine positive CD4 T cells in whole VZV antigen-exposed samples after subtraction of mock-exposed sample values

<sup>4</sup> TCL, T cell line

<sup>5</sup> dec, no sample due to subject declining biopsy

<sup>6</sup> ns, no swab acquired. A VZV swab sample was not collected from contralateral skin at day 30.

<sup>7</sup> nd, not determined due to lack of adequate sample

Supplementary Table 3. Absorbance OD450 values for anti-VZV gP IgG from ELISA

| Specimen |     | Serum dilution |      |      |      |      |       |
|----------|-----|----------------|------|------|------|------|-------|
| Subject  | Day | 20             | 80   | 320  | 1280 | 5120 | 20480 |
| 77       | 45  | 4.68           | 4.05 | 4.01 | 2.43 | 1.01 | 0.34  |
|          | 60  | 5.94           | 4.33 | 3.43 | 1.69 | 0.67 | 0.22  |
|          | 90  | 4.48           | 4.00 | 2.89 | 1.39 | 0.52 | 0.16  |
| 78       | 45  | 5.94           | 5.63 | 3.84 | 2.11 | 0.81 | 0.25  |
|          | 60  | 5.34           | 4.14 | 3.31 | 1.51 | 0.53 | 0.18  |
|          | 90  | 3.66           | 3.90 | 3.18 | 1.66 | 0.66 | 0.22  |
|          | 360 | 3.50           | 3.67 | 2.55 | 1.14 | 0.41 | 0.15  |
| 79       | 45  | 3.60           | 3.60 | 2.25 | 1.09 | 0.47 | 0.18  |
|          | 60  | 3.62           | 3.57 | 2.25 | 0.91 | 0.34 | 0.12  |
|          | 90  | 3.61           | 3.56 | 2.05 | 0.83 | 0.31 | 0.11  |
|          | 360 | 3.62           | 2.80 | 1.39 | 0.49 | 0.18 | 0.10  |
| 80       | 45  | 3.53           | 3.94 | 3.38 | 1.95 | 0.85 | 0.40  |
|          | 60  | 3.60           | 3.96 | 3.07 | 1.58 | 0.67 | 0.26  |
|          | 90  | 4.90           | 4.44 | 3.25 | 1.51 | 0.61 | 0.27  |
|          | 360 | 4.27           | 3.27 | 1.89 | 0.75 | 0.29 | 0.15  |
|          | 500 | 3.95           | 3.05 | 1.72 | 0.68 | 0.24 | 0.11  |
| 81       | 45  | 4.66           | 5.93 | 3.70 | 1.94 | 0.78 | 0.27  |
|          | 60  | 4.90           | 5.93 | 3.60 | 1.93 | 0.76 | 0.26  |
|          | 90  | 5.04           | 5.93 | 3.42 | 1.88 | 0.84 | 0.28  |
|          | 360 | 5.94           | 3.98 | 2.54 | 1.11 | 0.37 | 0.13  |
| 82       | 45  | 4.11           | 4.25 | 4.46 | 3.22 | 1.52 | 0.55  |
|          | 60  | 5.92           | 5.94 | 5.92 | 2.32 | 0.88 | 0.30  |
|          | 90  | 5.92           | 4.46 | 3.37 | 1.76 | 0.67 | 0.25  |
| 83       | 45  | 5.92           | 5.94 | 3.83 | 2.55 | 0.95 | 0.34  |
|          | 60  | 4.38           | 5.94 | 3.83 | 2.07 | 0.81 | 0.26  |
|          | 90  | 5.92           | 5.94 | 3.62 | 1.74 | 0.74 | 0.26  |
|          | 360 | 5.92           | 4.46 | 2.83 | 1.27 | 0.46 | 0.17  |
| 84       | 45  | 5.92           | 5.94 | 2.73 | 1.04 | 0.37 | 0.15  |
|          | 90  | 5.31           | 3.93 | 2.24 | 0.92 | 0.31 | 0.11  |
| 85       | 45  | 5.94           | 5.93 | 3.61 | 1.74 | 0.69 | 0.24  |
|          | 60  | 4.98           | 3.95 | 2.92 | 1.34 | 0.49 | 0.19  |
|          | 90  | 4.04           | 3.42 | 2.14 | 0.95 | 0.35 | 0.13  |
|          | 360 | 3.68           | 2.45 | 1.38 | 0.64 | 0.18 | 0.09  |
| 86       | 45  | 4.38           | 4.28 | 4.11 | 3.10 | 1.57 | 0.57  |
|          | 60  | 5.94           | 5.93 | 5.96 | 3.06 | 1.64 | 0.51  |
|          | 90  | 5.94           | 4.40 | 5.96 | 2.95 | 1.45 | 0.80  |
|          | 360 | 4.58           | 4.38 | 3.78 | 1.87 | 0.78 | 0.23  |
| 87       | 45  | 5.92           | 5.94 | 5.92 | 3.02 | 1.45 | 0.50  |
|          | 60  | 4.20           | 4.74 | 5.92 | 2.40 | 1.06 | 0.38  |
|          | 90  | 3.80           | 4.28 | 3.64 | 1.91 | 0.70 | 0.24  |
| 88       | 45  | 4.06           | 3.79 | 2.32 | 0.90 | 0.31 | 0.12  |
|          | 60  | 3.81           | 3.67 | 2.29 | 0.87 | 0.30 | 0.13  |
|          | 90  | 4.30           | 3.77 | 2.18 | 0.78 | 0.27 | 0.11  |
| 89       | 45  | 4.47           | 5.94 | 3.89 | 1.72 | 0.71 | 0.28  |
|          | 60  | 3.97           | 4.70 | 3.02 | 1.40 | 0.49 | 0.17  |
|          | 90  | 4.44           | 3.90 | 2.75 | 1.11 | 0.39 | 0.14  |
| 90       | 45  | 3.84           | 3.95 | 4.16 | 3.10 | 1.52 | 0.66  |
|          | 60  | 3.85           | 3.75 | 3.87 | 2.89 | 1.38 | 0.47  |
|          | 90  | 3.90           | 3.74 | 3.75 | 2.72 | 1.26 | 0.44  |
|          | 360 | 4.01           | 3.77 | 3.22 | 1.72 | 0.65 | 0.23  |
| 91       | 45  | 3.72           | 3.85 | 4.01 | 3.14 | 1.48 | 0.50  |
|          | 60  | 3.97           | 3.86 | 3.91 | 2.33 | 0.85 | 0.28  |
|          | 90  | 3.77           | 3.77 | 3.33 | 1.64 | 0.54 | 0.18  |
|          | 360 | 3.83           | 2.89 | 1.47 | 0.54 | 0.19 | 0.08  |
| 92       | 45  | 3.78           | 3.38 | 1.95 | 0.81 | 0.32 | 0.13  |
|          | 60  | 3.97           | 3.14 | 1.69 | 0.73 | 0.27 | 0.13  |
|          | 90  | 3.64           | 3.14 | 1.73 | 0.68 | 0.28 | 0.14  |
| 93       | 45  | 3.99           | 4.04 | 3.78 | 3.08 | 1.69 | 0.75  |
|          | 60  | 3.81           | 3.67 | 3.74 | 2.58 | 1.24 | 0.46  |
|          | 90  | 3.91           | 3.93 | 3.65 | 2.37 | 0.96 | 0.37  |
|          | 360 | 3.64           | 3.48 | 2.45 | 1.02 | 0.33 | 0.08  |
| 94       | 45  | 4.49           | 3.19 | 1.47 | 0.55 | 0.22 | 0.13  |
|          | 60  | 3.97           | 2.94 | 1.30 | 0.49 | 0.22 | 0.12  |
|          | 90  | 3.85           | 2.31 | 0.94 | 0.34 | 0.15 | 0.10  |
|          | 360 | 3.60           | 1.88 | 0.69 | 0.24 | 0.12 | 0.09  |



Supplementary Table 4. Immunohistochemistry staining of skin biopsies.

| Metric                                       | Subject | D45_CON | D45_HZ | D90_CON | D90_HZ | D360_CON | D360_HZ |
|----------------------------------------------|---------|---------|--------|---------|--------|----------|---------|
| A. Number of T cells per mm <sup>2</sup>     | 83      | 28.93   | 9.4    | 67.21   | 83.26  |          |         |
|                                              | 77      | 8.15    | 292.27 | 37.85   | 17.89  |          |         |
|                                              | 87      | 71.25   | 322.33 | 49.71   | 100.89 |          |         |
|                                              | 78      | 64.72   | 214    | 146.24  | 123.24 | 99.96    | 112.28  |
|                                              | 91      | 185.3   | 308.08 | 109     | 116.7  | 85.8     | 70.2    |
|                                              | 84      | 39.84   | 147.12 | 57.58   | 109.76 |          |         |
|                                              | 90      | 101.43  | 220.68 | 112.66  | 331.22 | 158.48   | 80.02   |
| B. Number of CD4 T cells per mm <sup>2</sup> | 83      | 10.27   | 4.39   | 36.64   | 50.47  |          |         |
|                                              | 77      |         | 121.06 | 28.33   | 10     |          |         |
|                                              | 87      | 46.18   | 141.88 | 37.8    | 98.82  |          |         |
|                                              | 78      | 173.4   | 84.89  | 59.7    | 25.3   | 21.28    | 35.3    |
|                                              | 91      | 125.37  | 181.58 | 64.18   | 125.36 | 7.14     | 43.06   |
|                                              | 84      | 20.33   | 124.85 | 17.8    | 80.35  |          |         |
|                                              | 90      | 45.2    | 81.62  | 56.93   | 276.45 | 25.47    | 21.5    |
| C. Number of CD8 T cells per mm <sup>2</sup> | 83      | 11.32   | 4.55   | 14.46   | 55.22  |          |         |
|                                              | 77      |         | 39.2   | 11.66   | 7.01   |          |         |
|                                              | 87      | 9.98    | 88.8   | 13.36   | 16.26  |          |         |
|                                              | 78      | 76.73   | 70.28  | 42.95   | 34.71  | 21.28    | 21.35   |
|                                              | 91      | 36.64   | 113.91 | 41.55   | 36.56  | 7.14     | 7.7     |
|                                              | 84      | 6.43    | 45.67  | 5.3     | 17.63  |          |         |
|                                              | 90      | 18.68   | 86.01  | 19.08   | 161.22 | 25.47    | 16.14   |
| D. Percent of CD69+ T cells                  | 83      |         |        | 100     | 90.5   |          |         |
|                                              | 77      |         |        | 94.1    | 84.7   |          |         |
|                                              | 87      | 82.3    | 94.1   | 91.3    | 100    |          |         |
|                                              | 78      |         | 93.9   | 77.1    | 62     | 86.1     | 87.5    |
|                                              | 91      | 100     | 86.1   | 100     | 88.2   | 76.1     |         |
|                                              | 84      | 91.6    | 71.5   | 82.3    | 85.9   |          |         |
|                                              | 90      | 89.6    | 82.5   | 100     | 100    | 100      | 80.5    |
| E. Percent of CD103+ T cells                 | 83      | 11.8    | 9.1    | 31.7    | 9.8    |          |         |
|                                              | 77      |         | 15     | 18.5    | 27     |          |         |
|                                              | 87      | 38.9    | 23.8   | 4.4     | 13.55  |          |         |
|                                              | 78      | 13.3    | 24.7   | 11      |        | 7        | 12.2    |
|                                              | 91      | 23.5    | 33.4   | 12.4    | 26     | 18.7     |         |
|                                              | 84      | 12.6    | 30     | 6.2     | 12.1   |          |         |
|                                              | 90      | 13.5    | 31.7   | 21.4    | 15.4   | 15.8     | 13.2    |
| F. Percent of TIA-1+ T cells                 | 83      | 21.1    | 38.8   | 26.8    | 16.4   |          |         |
|                                              | 77      | 55      | 37.9   | 16.9    | 33.3   |          |         |
|                                              | 87      | 9.9     | 74.3   | 7.1     | 28.6   |          |         |
|                                              | 78      | 17.3    | 31.4   | 17.4    | 43.1   | 23.5     | 28      |
|                                              | 91      | 13.1    | 34.4   | 25.9    | 13.5   | 40       | 16.7    |
|                                              | 84      | 14.8    | 79     | 8.3     | 27.8   |          |         |
|                                              | 90      | 14.4    | 42.4   | 10.8    | 61     | 9.6      | 19.6    |
| G. Percent of FOXP3+ T cells                 | 83      | 8.9     | 0.8    | 2.2     | 5.3    |          |         |
|                                              | 77      |         | 2.7    | 7.6     | 4.5    |          |         |
|                                              | 87      | 0.2     | 1.7    | 4.7     | 19     |          |         |
|                                              | 78      | 0       | 2.7    | 4.1     | 9.8    | 7.2      | 5.2     |
|                                              | 91      |         | 10.4   | 5.7     | 14.1   | 0        | 6.1     |
|                                              | 84      | 17      | 4.8    | 8.5     | 7.6    |          |         |
|                                              | 90      | 3.6     | 4      | 9.9     | 8.1    | 8.2      | 4.6     |

D45, day45; D90, day 90; D360, day 360; HZ, herpes zoster rash skin site; CON, contralateral skin site



Supplementary Table 6: Productive reads and clonotype diversity for CDR3 sequences calculated using VDJTools CalcDiversityStats function

| Specimen type* | Day | Productive TRB reads | Number of unique clonotypes (diversity) |
|----------------|-----|----------------------|-----------------------------------------|
| HZ Biopsy      | 45  | 56188                | 14022                                   |
| HZ Biopsy      | 90  | 29070                | 9684                                    |
| HZ Biopsy      | 360 | 13092                | 4920                                    |
| Con Biopsy     | 45  | 7318                 | 2891                                    |
| Con Biopsy     | 90  | 11256                | 4040                                    |
| Con Biopsy     | 360 | 21964                | 6580                                    |
| PBMC           | 45  | 309879               | 197002                                  |
| PBMC           | 90  | 264437               | 184989                                  |
| PBMC           | 360 | 329770               | 226618                                  |

\* HZ, herpes zoster rash site; Con, contralateral skin site

Supplementary Table 7. TR8 CDR3 sequences of VZV epitope-specific CD8 T cells.

| ORF   | Epitope   | cdr3nt                                                | cdr3aa             | v          | d       | j       | In column names: FREQ = frequency among all TRB sequences, CON = contralateral, D = day. |           |          |          |            |            |          |           |          |          |          |            |
|-------|-----------|-------------------------------------------------------|--------------------|------------|---------|---------|------------------------------------------------------------------------------------------|-----------|----------|----------|------------|------------|----------|-----------|----------|----------|----------|------------|
|       |           |                                                       |                    |            |         |         | Rank                                                                                     | FREQ_RASH | D45_SKIN | FREQ_CON | D45_SKIN   | FREQ_PBMIC | D45      | FREQ_RASH | D90_SKIN | FREQ_CON | D90_SKIN | FREQ_PBMIC |
| ORF9  | SLGVIYTVG | TGTGCCAGCAGTAATAATACAGGGGACTATGGCTACACCTT             | CASSKYTGVDGYTF     | TRBV6-5    | TRBD1-1 | TRBJ2-1 | 1                                                                                        | 6.52E-02  | 4.65E-03 | 3.02E-03 | 5.83E-02   | 7.20E-03   | 1.53E-03 | 2.50E-02  | 1.37E-03 | 1.73E-03 |          |            |
| ORF9  | SLGVIYTVG | TGTGCCAGCAGTAAATAATACAGGGGACTATGGCTACACCTT            | CASSKINTAAPQETQYF  | TRBV12     | TRBD1-1 | TRBJ2-5 | 2                                                                                        | 1.06E-02  | 4.10E-04 | 2.13E-04 | 1.04E-02   | 5.33E-04   | 6.43E-05 | 3.28E-03  | 2.28E-04 | 7.28E-05 |          |            |
| ORF9  | SLGVIYTVG | TGTGCCAGCAGCCCGCTGGGGAGCCGCAAGAACCCAGTACTT            | CASRPALGANHYQTF    | TRBV6-5    | TRBD1-1 | TRBJ2-1 | 3                                                                                        | 3.84E-03  | 1.37E-04 | 3.39E-04 | 4.27E-03   | 3.55E-04   | 1.17E-04 | 1.22E-03  | 9.11E-05 | 2.49E-04 |          |            |
| ORF9  | SLGVIYTVG | TGTGCCAGCAGCCGAGTGGGGAGCTGGAAGTGGCTACTT               | CASSPTPLNGYTF      | TRBV7-8    | TRBD1-2 | TRBJ2-2 | 4                                                                                        | 3.93E-03  | 0.00E+00 | 1.39E-03 | 4.32E-03   | 4.44E-04   | 1.13E-03 | 4.44E-04  | 1.37E-04 | 5.15E-05 |          |            |
| ORF9  | SLGVIYTVG | TGTGCCAGCAGCCTTTAGGAGCCATGAACACTGAAGCTTCTT            | CASSPLPQNTTEAFF    | TRBV7-2    | TRBD1-1 | TRBJ2-1 | 5                                                                                        | 3.36E-03  | 0.00E+00 | 1.74E-04 | 3.34E-03   | 3.55E-04   | 4.92E-05 | 1.30E-03  | 2.75E-04 |          |          |            |
| ORF9  | SLGVIYTVG | TGTGCCAGCAGCTGGGGAAAACAGGGAGCTACCCCTCCACTT            | CASSLGGQSDPLHF     | TRBV7-6    | TRBD1-1 | TRBJ2-6 | 6                                                                                        | 2.74E-03  | 1.37E-04 | 3.87E-05 | 2.30E-03   | 0.00E+00   | 2.27E-05 | 9.93E-04  | 0.00E+00 |          |          |            |
| ORF9  | SLGVIYTVG | TGTGCCCATAGTGAAGCAGGGGAGTACGGAGTAGTGACACAGATCCGATTTTT | CAISEPAPLAGVSDTQYF | TRBV10-3   | TRBD1-2 | TRBJ2-3 | 7                                                                                        | 9.61E-04  | 2.73E-04 | 4.20E-05 | 5.75E-04   | 8.88E-05   | 1.51E-05 | 4.55E-05  | 1.52E-05 |          |          |            |
| ORF9  | SLGVIYTVG | TGTGCCCATAGTGAAGCAGGGGAGTACGGAGTAGTGACACAGATCCGATTTTT | CAISEPAPLAGVSDTQYF | TRBV10-3   | TRBD1   | TRBJ2-5 | 8                                                                                        | 4.45E-04  | 2.73E-04 | 4.20E-05 | 5.16E-04   | 8.88E-05   | 1.89E-05 | 2.29E-04  | 4.55E-05 |          |          |            |
| ORF9  | SLGVIYTVG | TGTGCCAGCAGCTCCCGGAGCCAGGACACAGCAGTACTT               | CASSRVVGDGHEQYF    | TRBV7-6    | TRBD1-1 | TRBJ2-7 | 9                                                                                        | 2.31E-04  | 0.00E+00 | 5.42E-04 | 5.85E-04   | 0.00E+00   | 4.73E-04 | 1.53E-04  | 0.00E+00 |          |          |            |
| ORF9  | SLGVIYTVG | TGTGCCAGCAGCTTTGCAAGGGGACTGGCTACACCTT                 | CASSLFRDQYF        | TRBV7-9    | TRBD1-1 | TRBJ2-2 | 10                                                                                       | 2.14E-04  | 1.37E-04 | 2.29E-04 | 6.19E-04   | 8.88E-05   | 2.76E-04 | 2.29E-04  | 4.55E-05 |          |          |            |
| ORF9  | SLGVIYTVG | TGTGCCAGCAGCAGTAACTGAGGGGAGTACGACATCGCATTTTTGG        | CASSJADGSRVAFWF    | TRBV11-3   | TRBD1-1 | TRBJ2-3 | 11                                                                                       | 1.74E-04  | 2.73E-04 | 0.00E+00 | 3.78E-04   | 1.87E-03   | 0.00E+00 | 1.83E-03  | 1.41E-03 |          |          |            |
| ORF9  | SLGVIYTVG | TGTGCCAGCAGCTCCCGGAGCCGAGTACGACTACTT                  | CASSPTGATSEYQF     | TRBV7-9    | TRBD1-2 | TRBJ2-2 | 12                                                                                       | 1.42E-04  | 0.00E+00 | 3.44E-05 | 0.00E+00   | 0.00E+00   | 3.44E-05 | 0.00E+00  | 4.98E-03 |          |          |            |
| ORF9  | SLGVIYTVG | TGTGCCAGCAGCCAGCCCTCAGGAGAGAACCCAGTACTT               | CASRHPLEGTQYF      | TRBV28-1   | TRBD1-1 | TRBJ2-5 | 13                                                                                       | 1.25E-04  | 0.00E+00 | 9.68E-06 | 1.38E-04   | 0.00E+00   | 1.13E-05 | 0.00E+00  | 0.00E+00 |          |          |            |
| ORF9  | SLGVIYTVG | TGTGCCAGCAGCCCGGAGCTAAATTCACCCCTCACTT                 | CASSPANNPLHF       | TRBV6-5    | TRBD1-1 | TRBJ2-6 | 14                                                                                       | 1.07E-04  | 0.00E+00 | 1.41E-02 | 1.03E-04   | 1.78E-04   | 8.17E-03 | 1.53E-04  | 4.55E-05 |          |          |            |
| ORF9  | SLGVIYTVG | TGTGCCAGCTCACTCAGGGAGCTGGAAACCAATATTTTT               | CASSPTGSSNTYF      | TRBV18-1   | TRBD1-1 | TRBJ2-1 | 15                                                                                       | 1.07E-04  | 6.83E-04 | 1.61E-05 | 1.38E-04   | 1.24E-03   | 1.51E-05 | 3.06E-04  | 1.00E-03 |          |          |            |
| ORF9  | SLGVIYTVG | TGTGCCAGCAGTAAAGTGGAGCTGTGGTACACCTT                   | CASVESYGYTF        | TRBV6-1    | TRBD1-1 | TRBJ2-2 | 16                                                                                       | 8.90E-05  | 0.00E+00 | 1.45E-03 | 6.88E-05   | 8.88E-05   | 5.84E-04 | 0.00E+00  | 1.06E-03 |          |          |            |
| ORF9  | SLGVIYTVG | TGTGCCAGCAGTAACTGACACAGATACGAGTATTT                   | CASSYHSDTQYF       | TRBV6-5    | TRBD1   | TRBJ2-3 | 17                                                                                       | 7.12E-05  | 4.10E-04 | 0.00E+00 | 1.72E-04   | 5.33E-04   | 7.56E-06 | 3.06E-04  | 6.06E-06 |          |          |            |
| ORF9  | SLGVIYTVG | TGTGCCAGCAGCTAGCTAGTGGTATTGATGAAGCTTCTT               | CASSLRVSEAFF       | TRBV11-2   | TRBD1-1 | TRBJ2-1 | 18                                                                                       | 1.78E-05  | 4.10E-04 | 1.16E-04 | 3.44E-05   | 2.67E-04   | 9.83E-03 | 1.82E-04  | 8.19E-05 |          |          |            |
| ORF9  | SLGVIYTVG | TGTGCCAGCAGCCAGCCAGGGTGGTGGTACCGCAGCATTTT             | CASRDPLSQDQYF      | TRBV6      | TRBD1-1 | TRBJ2-1 | 19                                                                                       | 1.78E-05  | 0.00E+00 | 4.20E-05 | 0.00E+00   | 0.00E+00   | 7.56E-06 | 0.00E+00  | 2.12E-05 |          |          |            |
| ORF9  | SLGVIYTVG | TGTGCCAGCAGCCAGGGGAGCCGAGTACGACTACTT                  | CASRAGTGEAFF       | TRBV27-1   | TRBD1-1 | TRBJ2-1 | 20                                                                                       | 0.00E+00  | 0.00E+00 | 0.00E+00 | 0.00E+00   | 0.00E+00   | 0.00E+00 | 0.00E+00  | 0.00E+00 |          |          |            |
| ORF9  | SLGVIYTVG | TGTGCCAGCAGCCAGGGGAGCCGAGTACGACTACTT                  | CASSRQDRENEQYF     | TRBV5-1    | TRBD1-1 | TRBJ2-1 | 21                                                                                       | 0.00E+00  | 0.00E+00 | 6.45E-06 | 3.44E-06   | 0.00E+00   | 3.78E-06 | 0.00E+00  | 3.03E-06 |          |          |            |
| ORF9  | SLGVIYTVG | TGTGCCAGCAGCCGTGGTGGAGGATGAAGCTTCTT                   | CASSRGEYEAFF       | TRBV11-3   | TRBD1-1 | TRBJ2-1 | 22                                                                                       | 0.00E+00  | 0.00E+00 | 1.94E-05 | 0.00E+00   | 0.00E+00   | 1.89E-05 | 0.00E+00  | 1.52E-05 |          |          |            |
| ORF9  | SLGVIYTVG | TGTGCCAGCAGCTGACTGCTGGGTTGTCAGGGGCGGTTTTATGGCTACACCTT | CATSARNGTGGGPGYTF  | TRBV24-1   | TRBD1-1 | TRBJ2-2 | 23                                                                                       | 0.00E+00  | 0.00E+00 | 3.87E-05 | 0.00E+00   | 0.00E+00   | 1.89E-05 | 0.00E+00  | 4.55E-05 |          |          |            |
| ORF18 | ILIEGIFVS | TGTGCCAGCAGCTGCGAGACGTGGACCCCTATGGCTACACCTT           | CASSFTVDVPGYTF     | TRBV7-8    | TRBD1-1 | TRBJ2-1 | 1                                                                                        | 8.46E-02  | 0.00E+00 | 4.71E-04 | 5.58E-02   | 8.88E-05   | 2.31E-04 | 1.13E-02  | 0.00E+00 |          |          |            |
| ORF18 | ILIEGIFVS | TGTGCCAGCAGCCAGCCAGGGGAGCCGAGTATGGCTACACCTT           | CATSTRATVYGYTF     | TRBV15-1   | TRBD1-1 | TRBJ2-2 | 2                                                                                        | 6.40E-02  | 2.26E-03 | 1.78E-03 | 5.51E-02   | 6.22E-04   | 1.35E-03 | 6.11E-03  | 1.21E-03 |          |          |            |
| ORF18 | ILIEGIFVS | TGTGCCAGCAGTGAAGCCAGGGCCCAAGCCATGGCTACACCTT           | CASSEAOPIHGYTF     | TRBV6-1    | TRBD1-1 | TRBJ2-2 | 3                                                                                        | 1.05E-02  | 0.00E+00 | 1.45E-04 | 6.23E-03   | 0.00E+00   | 6.81E-05 | 7.64E-04  | 0.00E+00 |          |          |            |
| ORF18 | ILIEGIFVS | TGTGCCAGCAGCCCTCAGGGGCTTGAACACTGAAGCTTCTT             | CASSPOGALNTFAFF    | TRBV14-1   | TRBD1-1 | TRBJ2-1 | 4                                                                                        | 4.66E-03  | 0.00E+00 | 3.23E-05 | 4.09E-03   | 0.00E+00   | 1.89E-05 | 9.17E-04  | 2.12E-05 |          |          |            |
| ORF18 | ILIEGIFVS | TGTGCCAGCTGCTCAAGGGGGTACGGGGTGGGGGAGCGTGTTTTT         | CASSPQGGSSRGLLEFF  | TRBV11-2   | TRBD1-2 | TRBJ2-2 | 5                                                                                        | 2.90E-03  | 0.00E+00 | 2.90E-05 | 2.27E-03   | 0.00E+00   | 1.51E-03 | 1.07E-03  | 0.00E+00 |          |          |            |
| ORF18 | ILIEGIFVS | TGTGCCAGCAGCAGCAGGGGCTGGGGAGGGGGGCTGTTTTT             | CASSYTGALGTLEFF    | TRBV13-1   | TRBD1-1 | TRBJ2-2 | 6                                                                                        | 2.83E-03  | 4.10E-04 | 1.74E-04 | 2.17E-03   | 1.24E-03   | 1.10E-04 | 5.46E-04  | 1.67E-04 |          |          |            |
| ORF18 | ILIEGIFVS | TGTGCCAGCAGTACTTCTCAAGAGCTGAGCAGTCTT                  | CASSYFTRTEQYF      | TRBV6-6    | TRBD1   | TRBJ2-1 | 7                                                                                        | 2.67E-03  | 0.00E+00 | 3.23E-05 | 1.82E-03   | 0.00E+00   | 2.27E-05 | 8.40E-04  | 2.43E-05 |          |          |            |
| ORF18 | ILIEGIFVS | TGTGCCAGCAGCCAGGGGCTGGGATGGCCACTGAAGCTTCTT            | CASSOGGAMATEAFF    | TRBV14-1   | TRBD1   | TRBJ2-1 | 8                                                                                        | 2.62E-03  | 0.00E+00 | 0.00E+00 | 1.79E-03   | 0.00E+00   | 3.78E-06 | 0.00E+00  | 0.00E+00 |          |          |            |
| ORF18 | ILIEGIFVS | TGCAGTCTAGGGAGCCAGGGGACTGAAGCTTCTT                    | CASRDGTEAFF        | TRBV20     | TRBD1-1 | TRBJ2-1 | 9                                                                                        | 1.42E-03  | 6.45E-06 | 4.47E-04 | 0.00E+00   | 0.00E+00   | 0.00E+00 | 3.02E-04  | 3.03E-06 |          |          |            |
| ORF18 | ILIEGIFVS | TGTGCCAGTAAAGGAGTCAATGAAGCTTCTT                       | CASISGYNQYF        | TRBV2-1    | TRBD1   | TRBJ2-1 | 10                                                                                       | 9.61E-04  | 0.00E+00 | 5.81E-05 | 9.63E-04   | 8.88E-05   | 2.65E-05 | 3.29E-04  | 1.37E-04 |          |          |            |
| ORF18 | ILIEGIFVS | TGTGCCAGTAAAGTCACTAGGGTCTCAATGAAGCAGTCTT              | CASSMSTGSYNEQYF    | TRBV19-1   | TRBD1-1 | TRBJ2-1 | 11                                                                                       | 7.12E-04  | 0.00E+00 | 4.84E-04 | 1.03E-03   | 8.88E-05   | 3.03E-04 | 1.37E-04  | 3.43E-04 |          |          |            |
| ORF18 | ILIEGIFVS | TGTGCCAGCTCAGGGGCTGGGCTGATGGCTACACCTT                 | CASSQSGAPVGYTF     | TRBV19-1   | TRBD1-1 | TRBJ2-2 | 12                                                                                       | 6.23E-04  | 0.00E+00 | 5.29E-04 | 5.50E-04   | 8.88E-05   | 2.80E-04 | 3.06E-04  | 9.11E-05 |          |          |            |
| ORF18 | ILIEGIFVS | TGTGCCAGCAGCCAGGGGCTTACGAGCAGTACTT                    | CASKRGSQYF         | TRBV28-1   | TRBD1-1 | TRBJ2-1 | 13                                                                                       | 5.87E-04  | 1.37E-04 | 4.20E-04 | 6.88E-04   | 8.88E-05   | 4.58E-04 | 1.53E-04  | 4.55E-05 |          |          |            |
| ORF18 | ILIEGIFVS | TGTGCCAGCAGCCAGGGGAGCCGAGTACGACTACTT                  | CASSPQDRENEQYF     | TRBV6-1    | TRBD1-1 | TRBJ2-1 | 14                                                                                       | 5.87E-04  | 0.00E+00 | 3.44E-05 | 0.00E+00   | 0.00E+00   | 0.00E+00 | 0.00E+00  | 0.00E+00 |          |          |            |
| ORF18 | ILIEGIFVS | TGTGCCAGCAGCTGGTGGTGGAGCTGATATTCACCCCTCACTT           | CASSLWRSSYNSPLHF   | TRBV6-5    | TRBD1-1 | TRBJ2-6 | 15                                                                                       | 5.52E-04  | 1.37E-04 | 9.68E-05 | 8.94E-04   | 8.88E-05   | 1.02E-04 | 5.35E-04  | 3.64E-04 |          |          |            |
| ORF18 | ILIEGIFVS | TGTGCCAGCAGTGAAGGGGAGCCGAGGGGGGAGCGTGTTTTT            | CASSPQGGSSRGLLEFF  | TRBV11-2   | TRBD1-2 | TRBJ2-2 | 16                                                                                       | 5.52E-04  | 0.00E+00 | 6.45E-06 | 3.10E-04   | 0.00E+00   | 3.78E-06 | 1.00E+00  | 9.10E-06 |          |          |            |
| ORF18 | ILIEGIFVS | TGTGCCAGCAGTAAAGGGGCTGGGAGGAGTACGAGTATTTG             | CASSDRGLWEIGERISL  | TRBV10-1   | TRBD1-2 | TRBJ2-3 | 17                                                                                       | 3.56E-04  | 0.00E+00 | 3.23E-06 | 3.06E-04   | 0.00E+00   | 3.78E-06 | 7.64E-05  | 0.00E+00 |          |          |            |
| ORF18 | ILIEGIFVS | TGTGCCAGCAGCTTCCAGGGGAGCCGAGTACGACTACTT               | CASSLRGSEYQYF      | TRBV7-8    | TRBD1-2 | TRBJ2-7 | 18                                                                                       | 3.38E-04  | 2.73E-04 | 9.65E-03 | 2.78E-04   | 1.78E-04   | 8.91E-03 | 2.92E-04  | 0.00E+00 |          |          |            |
| ORF18 | ILIEGIFVS | TGTGCCAGTGTCCCAAGGGGAGCCGAGTAAACCAATATTTTT            | CASVPRGQVPEYLF     | TRBV5-1    | TRBD1-1 | TRBJ2-3 | 19                                                                                       | 3.38E-04  | 0.00E+00 | 2.58E-04 | 5.16E-04   | 8.88E-05   | 1.13E-04 | 3.06E-04  | 4.55E-05 |          |          |            |
| ORF18 | ILIEGIFVS | TGTGCCAGTAAAGTCACTAGGGTCTCAATGAAGCAGTCTT              | CASSMSTGSYNEQYF    | TRBV19-1   | TRBD1-2 | TRBJ2-2 | 20                                                                                       | 3.38E-04  | 0.00E+00 | 1.23E-04 | 3.78E-04   | 1.78E-04   | 1.13E-04 | 3.06E-04  | 0.00E+00 |          |          |            |
| ORF18 | ILIEGIFVS | TGTGCCAGCAGCTCGAGACAGGGGCTGATGGCTACACCTT              | CASSSTGSEYQYF      | TRBV9-1    | TRBD1-1 | TRBJ2-2 | 21                                                                                       | 1.96E-04  | 2.60E-03 | 6.45E-06 | 6.54E-04   | 2.75E-03   | 7.56E-06 | 1.15E-03  | 7.28E-04 |          |          |            |
| ORF18 | ILIEGIFVS | TGTGCCAGCAGCCAGGGGAGCCGAGTACGACTACTT                  | CASSRHWGGYQETQYF   | TRBV7-8    | TRBD1-1 | TRBJ2-5 | 22                                                                                       | 1.78E-04  | 1.39E-04 | 9.68E-06 | 2.75E-04   | 0.00E+00   | 3.78E-06 | 0.00E+00  | 3.03E-06 |          |          |            |
| ORF18 | ILIEGIFVS | TGTGCCAGCAGTACTGCTGCTTCACTGAGCAGTACTT                 | CASDLVITVPTSTYS    | TRBV6-4    | TRBD1-2 | TRBJ2-2 | 23                                                                                       | 1.42E-04  | 4.10E-04 | 1.74E-04 | 1.78E-04   | 1.42E-04   | 3.19E-04 | 1.13E-04  | 1.67E-04 |          |          |            |
| ORF18 | ILIEGIFVS | TGTGCCAGCAGCCCTGACTTCTCAAGCAGTACTT                    | CASSPTSEYQYF       | TRBV9-1    | TRBD1   | TRBJ2-2 | 24                                                                                       | 1.25E-04  | 1.37E-04 | 1.87E-03 | 3.44E-05   | 0.00E+00   | 1.84E-03 | 1.53E-04  | 0.00E+00 |          |          |            |
| ORF18 | ILIEGIFVS | TGTGCCAGCAGTAAAGGGGAGCCGAGGGGGGAGCGTGTTTTT            | CASSEVSTRRYTF      | TRBV6-1    | TRBD1-1 | TRBJ2-2 | 25                                                                                       | 1.25E-04  | 3.10E-03 | 3.44E-05 | 0.00E+00   | 0.00E+00   | 1.84E-03 | 4.55E-05  | 2.54E-03 |          |          |            |
| ORF18 | ILIEGIFVS | TGTGCCAGCAGCCAGCTCAAGCAGGGGAGCCGAGTACTT               | CASSQTSRDEQYF      | TRBV4-1    | TRBD1-2 | TRBJ2-2 | 26                                                                                       | 1.07E-04  | 0.00E+00 | 1.97E-04 | 6.88E-05   | 0.00E+00   | 1.29E-04 | 7.64E-05  | 0.00E+00 |          |          |            |
| ORF18 | ILIEGIFVS | TGTGCCAGCAGCTTCCAGGGGAGCCGAGTAAACCAATATTTTT           | CASSALPAGTNEKLF    | TRBV7-6    | TRBD1-1 | TRBJ2-4 | 27                                                                                       | 1.07E-04  | 0.00E+00 | 2.28E-03 | 1.03E-04   | 8.88E-05   | 1.41E-03 | 0.00E+00  | 1.64E-04 |          |          |            |
| ORF18 | ILIEGIFVS | TGTGCCAGTAAAGTCTAGGGGAGCCGAGTAAACCAATATTTTT           | CASSPTSGGNQPHF     | TRBV19-1   | TRBD1-1 | TRBJ2-5 | 28                                                                                       | 1.07E-04  | 0.00E+00 | 1.00E-04 | 1.03E-04   | 8.88E-05   | 1.51E-05 | 7.64E-05  | 0.00E+00 |          |          |            |
| ORF18 | ILIEGIFVS | TGTGCCAGTAAAGTCTAGGGGAGCCGAGTACTT                     | CASSMGTQYF         | TRBV19-1   | TRBD1-2 | TRBJ2-5 | 29                                                                                       | 8.90E-05  | 0.00E+00 | 3.23E-06 | 6.88E-05   | 8.88E-05   | 3.78E-06 | 0.00E+00  | 0.00E+00 |          |          |            |
| ORF18 | ILIEGIFVS | TGTGCCAGCAGCCAGGGGAGCCGAGTACGACTACTT                  | CASSPQDRENEQYF     | TRBV6-1    | TRBD1-1 | TRBJ2-3 | 30                                                                                       | 7.12E-05  | 0.00E+00 | 1.72E-04 | 0.00E+00   | 0.00E+00   | 3.03E-05 | 0.00E+00  | 6.06E-05 |          |          |            |
| ORF18 | ILIEGIFVS | TGTGCCAGCAGCTTCCAGGGGAGCCGAGTACGACTACTT               | CASSRQDRENEQYF     | TRBV6-5    | TRBD1-2 | TRBJ2-2 | 31                                                                                       | 7.12E-05  | 0.00E+00 | 3.23E-05 | 6.88E-05   | 0.00E+00   | 0.00E+00 | 0.00E+00  | 0.00E+00 |          |          |            |
| ORF18 | ILIEGIFVS | TGTGCCAGCAGCTTCCAGGGGAGCCGAGTAAACCAATATTTTT           | CATSVPSSYNEQYF     | TRBV6-2    | TRBD1-1 | TRBJ2-1 | 32                                                                                       | 7.12E-05  | 0.00E+00 | 1.29E-05 | 0.00E+00   | 0.00E+00   | 1.51E-05 | 0.00E+00  | 2.12E-05 |          |          |            |
| ORF18 | ILIEGIFVS | TGCAGTGGAAATCAGGCTTACGAGCAGTACTT                      | CASANTGSEYQYF      | TRBV20     | TRBD1-1 | TRBJ2-3 | 33                                                                                       | 5.34E-05  | 0.00E+00 | 6.55E-04 | 2.06E-04   | 8.88E-05   | 7.07E-04 | 7.64E-05  | 1.82E-04 |          |          |            |
| ORF18 | ILIEGIFVS | TGTGCCAGCAGTCCAGTCTTACGGGGGCTCAATGAAGCAGTCTT          | CASSPFPAGYNEQYF    | TRBV4-1    | TRBD1-2 | TRBJ2-4 | 34                                                                                       | 5.34E-05  | 0.00E+00 | 3.07E-04 | 1.38E-04   | 0.00E+00   | 2.19E-04 | 0.00E+00  | 9.11E-05 |          |          |            |
| ORF18 | ILIEGIFVS | TGTGCCAGCAGCCAGGGGAGCCGAGGAGCGGAGCTGTTTTT             | CASSQETGGIGLEFF    | TRBV4-2    | TRBD1-1 | TRBJ2-2 | 35                                                                                       | 5.34E-05  | 0.00E+00 | 1.68E-04 | 3.44E-05   | 0.00E+00   | 1.93E-04 | 1.53E-04  | 0.00E+00 |          |          |            |
| ORF18 | ILIEGIFVS | TGTGCCAGCAGCTACCCAGGAGAAAACCTGTTTTT                   | CASSHPDKLFF        | TRBV12-3/1 | TRBD1-1 | TRBJ2-4 | 36                                                                                       | 5.34E-05  | 0.00E+00 | 4.84E-05 | 1.38E-04</ |            |          |           |          |          |          |            |
